# Supplementary material
Source: PubMed Central journal article supplement (PMC5940533)
Supplement: NIHMS952803-supplement.pdf [file NIHMS952803-supplement.pdf]

*Supplement to Dodge-Kafka, et al:*

**IP:  $\alpha$ -Flag**

mAKAP-GFP: + +  
HDAC4-Flag: + +

IB: mAKAP-GFP  250

**Input:**

IB: mAKAP-GFP  250

IB: HDAC4-Flag  100

Supplementary Figure1. **mAKAP $\beta$  binds HDAC4.** Vero cells were co-transfected with expression plasmids for Flag-tagged HDAC4 and GFP-tagged mAKAP. Extracts were used in co-immunoprecipitation assays with Flag tag antibodies, and expression of the recombinant proteins was detected by western using GFP or HDAC antibodies.  $n = 3$ .

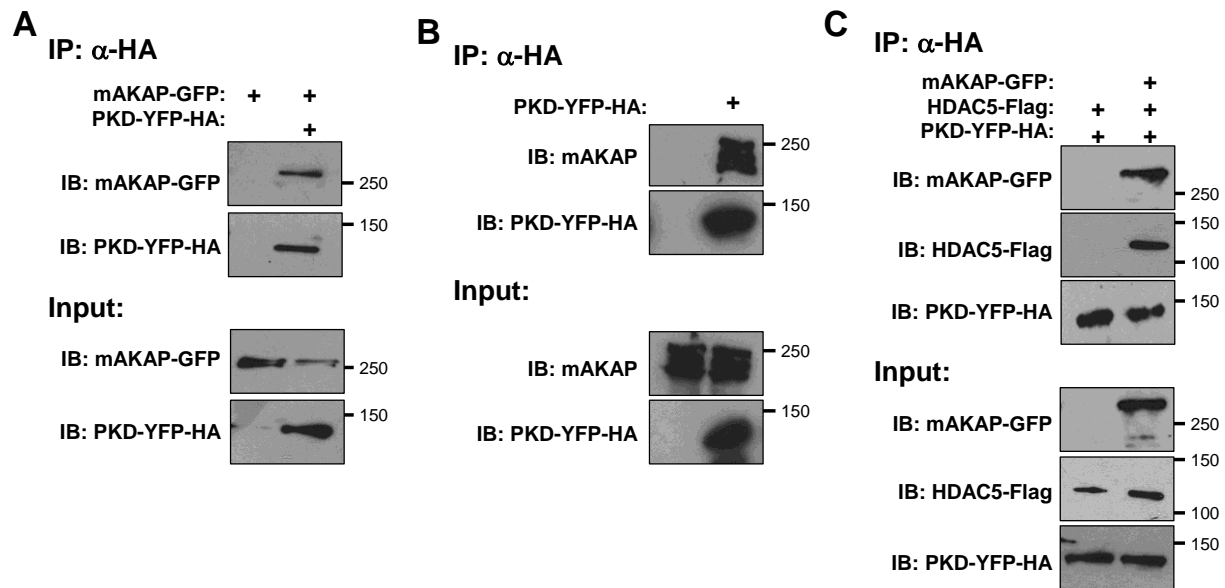

Supplementary Figure 2. **mAKAP $\beta$  PKD-HDAC5 Signalosomes.** **A.** HEK293 cells were co-transfected with expression plasmids for YFP and HA-tagged PKD and GFP-tagged mAKAP. Extracts were used in co-immunoprecipitation assays with HA-tag antibodies, and expression of the recombinant proteins was using HA or GFP antibodies. **B.** Neonatal rat ventricular myocytes were infected with virus for PKD-YFP-HA. Extracts were used in co-immunoprecipitation assays with HA-tag antibodies, and expression of endogenous mAKAP $\beta$  and recombinant PKA was using mAKAP and HA antibodies. **C.** HEK293 cells were co-transfected with expression plasmids for PKD-YFP-HA, mAKAP-GFP and HDAC5-Flag. Extracts were used in co-immunoprecipitation assays with HA-tag antibodies, and expression of the recombinant proteins was using tag antibodies.  $n = 3$  for each panel.
